# Supplementary material
Source: HighWire-hosted journal article supplement (https://www.cmaj.ca/highwire/filestream/58336/field_highwire_adjunct_files/0/image-tu-1-at.pdf)

Appendix 1: Computed tomographic scan of the chest of a 44-year-old woman with hemoptysis showing multiple cavitory nodules (arrows) with left-sided pneumothorax (arrow head).

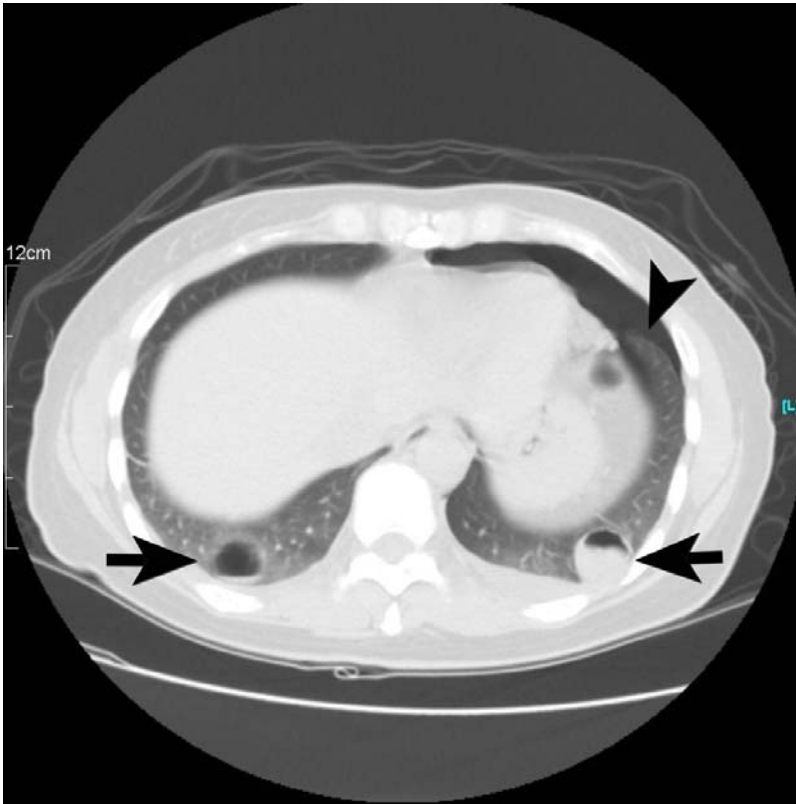

Supplement: image-tu-1-at.pdf [file image-tu-1-at.pdf]
